# Supplementary material for: Comparison of Four Foraminiferal Biotic Indices Assessing the Environmental Quality of Coastal Mediterranean Soft Bottoms
Source: MDPI journal article supplement (doi:10.3390/w13223193), 2021-11-11
Supplement: s1 [file s1]

## S2. Reference curves

### S2.1. TSI-Med reference curve

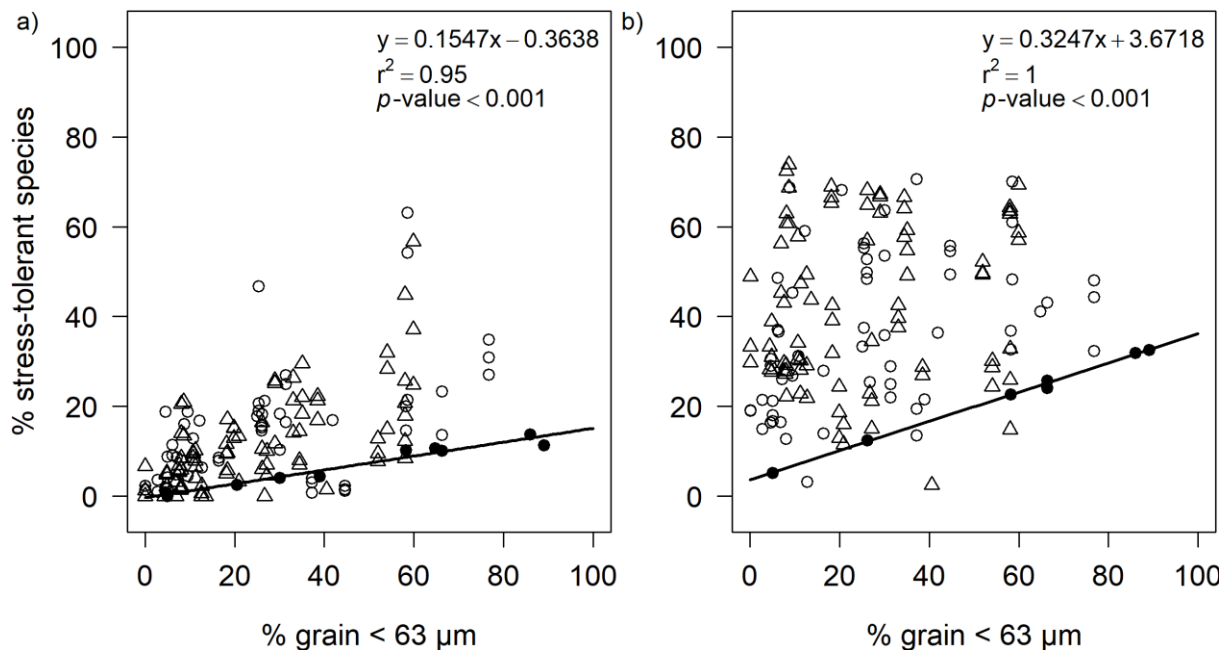

**Figure S2.1.** Reference curves for the TSI-Med index. The percentage of the tolerant taxa in the 125–500  $\mu\text{m}$  fraction is plotted as a function of sediment grain size (% grains < 63  $\mu\text{m}$ ).  $\circ$ : 2012;  $\Delta$ : 2015. Plain symbols: reference stations. a) Reference curve based on the ecological assignments of Barras et al. (2014). b) New reference curve based on the ecological assignments of Jorissen et al. (2018). NB: Both reference curves are only based on the 2012 data (circles) from stations along the French mainland coast, which explains why some of the data (i.e., stations from Corsica and/or from 2015) plot below the reference curve.

## S2.2. Foram-AMBI and FSI reference curves

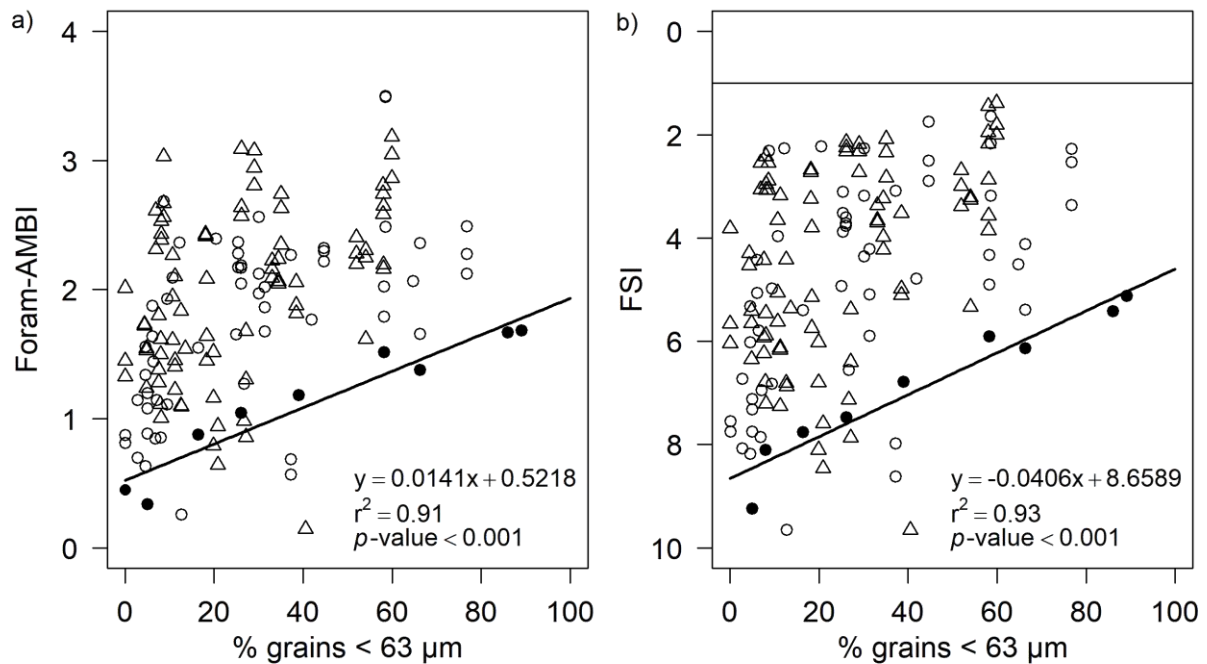

**Figure S2.2.** Reference curves for a) the Foram-AMBI and b) the FSI. Both quality indices are based on the homogenised groups of indicator species (i.e., Foram-AMBI assignment, (Jorissen *et al.*, 2018), and are plotted as a function of sediment grain size (% grains < 63 µm). ○: 2012; △: 2015. Plain symbols: reference stations. NB: Both reference curves are only based on the 2012 data (circles) from stations along the French mainland coast, which explains why some of the data (i.e., stations from Corsica and/or from 2015) plot below the reference curve.

## S2.3. References

- Barras, C., Jorissen, F. J., Labrune, C., Andral, B., and Boissery, P. 2014. Live benthic foraminiferal faunas from the French Mediterranean Coast: Towards a new biotic index of environmental quality. *Ecological Indicators*, 36: 719–743.
- Jorissen, F. J., Nardelli, M. P., Almogi-Labin, A., Barras, C., Bergamin, L., Bicchi, E., El Kateb, A., *et al.* 2018. Developing Foram-AMBI for biomonitoring in the Mediterranean: Species assignments to ecological categories. *Marine Micropaleontology*, 140: 33–45.
