# Supplementary material for: Comparison of Four Foraminiferal Biotic Indices Assessing the Environmental Quality of Coastal Mediterranean Soft Bottoms
Source: MDPI journal article supplement (doi:10.3390/w13223193), 2021-11-11
Supplement: s1 [file s1]

Archive with 4 entries (4 files):
- Parent et al._water-1395144_2021-11-01_Supplementary 3,Table S3-Species_assignments.xlsx
- Parent et al._water-1395144_2021-11-01_Supplementary 4,Table S4-Models unassigned species under 20%.pdf
- Parent et al._water-1395144_2021-11-01_Supplementary 1, Table S1-Sampled_stations.xlsx
- Parent et al._water-1395144_2021-11-01_Supplementary 2, Figures S2-indices_reference_curves.pdf
