# Supplementary material for: Comparison of Four Foraminiferal Biotic Indices Assessing the Environmental Quality of Coastal Mediterranean Soft Bottoms
Source: MDPI journal article supplement (doi:10.3390/w13223193), 2021-11-11
Supplement: s1 [file s1 › Parent et al._water-1395144_2021-11-01_Supplementary 1, Table S1-Sampled_stations.xlsx]

## Sheet: Table S1, Sampled stations
Station	Region	Sampling year	Latitude (°N)	Longitude (°E)	Depth (m)
Ajaccio Nord	Corsica	2012	41° 55' 1.65''	8° 46' 34.16''	65
Ajaccio Sud	Corsica	2012	41° 51' 51.52''	8° 46' 37.92''	37
Aléria (Tavignano)	Corsica	2012	42° 3' 29.78''	9° 34' 28.87''	44
Bastia Sud	Corsica	2012	42° 39' 56.14''	9° 27' 38.35''	30
Bonifacio	Corsica	2012	41° 23' 22.82''	9° 9' 12.97''	20
Calvi (Revellata)	Corsica	2012	42° 34' 51.12''	8° 43' 50.46''	43
Canari	Corsica	2012	42° 48' 21.21''	9° 19' 34.59''	34
Cargèse	Corsica	2012	42° 9' 41.46''	8° 33' 31.56''	60
Figari Bruzzi	Corsica	2012	41° 27' 54.48''	9° 0' 18.85''	39
Saint Florent	Corsica	2012	42° 42' 31.09''	9° 17' 38.94''	36
Santa Giulia	Corsica	2012	41° 30' 51.42''	9° 18' 11.1''	36
Agde Est	LR-PACA	2012	43° 16' 15.21''	3° 32' 25.73''	22
Antibes Nord	LR-PACA	2012	43° 36' 49.2''	7° 8' 9.91''	17.9
Antibes Sud	LR-PACA	2012	43° 33' 37.89''	7° 8' 38.63''	30.5
Beauduc	LR-PACA	2012	43° 24' 47.61''	4° 30' 51.9''	13
Cap Canaille	LR-PACA	2012	43° 10' 53.83''	5° 33' 14.41''	71
Carry	LR-PACA	2012	43° 18' 40.9''	5° 9' 37.29''	41
Carteau	LR-PACA	2012	43° 23' 11.21''	4° 53' 41.45''	10
Collioure	LR-PACA	2012	42° 31' 55.17''	3° 5' 22.11''	23
Faraman	LR-PACA	2012	43° 19' 40.83''	4° 42' 47.13''	11.9
Fos	LR-PACA	2012	43° 21' 45''	4° 55' 36.23''	18
Fréjus (St Raphaël)	LR-PACA	2012	43° 25' 16.14''	6° 52' 5.9''	38.5
Grau du Roi	LR-PACA	2012	43° 31' 2.49''	4° 3' 39.94''	14.5
Gruissan	LR-PACA	2012	43° 9' 8.72''	3° 12' 7.03''	20
Île Embiez	LR-PACA	2012	43° 6' 2.01''	5° 46' 36.04''	32
Île Maire	LR-PACA	2012	43° 12' 14.28''	5° 20' 48.11''	41
Île Plane	LR-PACA	2012	43° 11' 44.61''	5° 22' 58.03''	34
Lavandou	LR-PACA	2012	43° 6' 5.16''	6° 23' 16.56''	36
Leucate	LR-PACA	2012	42° 51' 21''	3° 3' 29.94''	22
Menton	LR-PACA	2012	43° 45' 17.95''	7° 29' 41.44''	53
Nice Ville	LR-PACA	2012	43° 40' 45.68''	7° 14' 9.5''	13
Pampelonne	LR-PACA	2012	43° 13' 44.9''	6° 41' 42.39''	43
Porquerolles	LR-PACA	2012	43° 1' 20.53''	6° 16' 31.16''	45
Sète	LR-PACA	2012	43° 22' 38.81''	3° 42' 43.04''	20
Toulon Grande Rade	LR-PACA	2012	43° 5' 36.58''	5° 56' 53.7''	29
Villefranche	LR-PACA	2012	43° 41' 27.14''	7° 18' 44.16''	52
Aléria (Tavignano)	Corsica	2015	42° 7' 49.57''	9° 34' 58.36''	40
Bonifacio	Corsica	2015	41° 23' 21.6''	9° 9' 17.11''	18.5
Calvi (Revellata)	Corsica	2015	42° 34' 51.24''	8° 43' 52.71''	44
Cargèse	Corsica	2015	42° 7' 22.68''	8° 36' 32.55''	38.7
Figari Bruzzi	Corsica	2015	41° 27' 28.48''	9° 0' 9.91''	41.5
Santa Giulia	Corsica	2015	41° 28' 36.04''	9° 17' 27.91''	38.8
Agde Ouest	LR-PACA	2015	43° 14' 20.79''	3° 28' 20.46''	18.8
Antibes Nord	LR-PACA	2015	43° 36' 47.6''	7° 8' 10.41''	30
Antibes Sud	LR-PACA	2015	43° 33' 36.08''	7° 8' 37.23''	30
Beauduc	LR-PACA	2015	43° 24' 3.05''	4° 29' 51.92''	14.5
Cap Canaille	LR-PACA	2015	43° 12' 1.44''	5° 31' 46.64''	49
Carry	LR-PACA	2015	43° 18' 28.77''	5° 9' 36.04''	55
Collioure	LR-PACA	2015	42° 31' 51.39''	3° 5' 22.05''	22
Faraman	LR-PACA	2015	43° 19' 41.21''	4° 42' 44.72''	11
Fos	LR-PACA	2015	43° 22' 0.27''	4° 55' 53.31''	20
Fréjus (St Raphaël)	LR-PACA	2015	43° 25' 11.18''	6° 52' 20.56''	52.6
Grau du Roi	LR-PACA	2015	43° 30' 58.09''	4° 4' 8.88''	14.5
Gruissan	LR-PACA	2015	43° 9' 10.34''	3° 12' 2.31''	20
Île Embiez	LR-PACA	2015	43° 6' 0.48''	5° 46' 32.37''	35
Île Maire	LR-PACA	2015	43° 12' 14.35''	5° 20' 48.72''	44
Leucate	LR-PACA	2015	42° 51' 24.94''	3° 3' 39.62''	16
Marseille Grande Rade	LR-PACA	2015	43° 15' 54.72''	5° 19' 24.65''	37
Menton	LR-PACA	2015	43° 45' 21.65''	7° 29' 38.84''	64
Nice Ville	LR-PACA	2015	43° 40' 46.39''	7° 14' 6.41''	12.7
Pampelonne	LR-PACA	2015	43° 13' 47.98''	6° 41' 43.33''	38
Porquerolles	LR-PACA	2015	43° 1' 21.6''	6° 16' 30.06''	44
Toulon Grande Rade	LR-PACA	2015	43° 5' 14.52''	5° 58' 10.41''	48
Villefranche	LR-PACA	2015	43° 41' 29.49''	7° 18' 50.27''	64
