# Supplementary material for: Comparison of Four Foraminiferal Biotic Indices Assessing the Environmental Quality of Coastal Mediterranean Soft Bottoms
Source: MDPI journal article supplement (doi:10.3390/w13223193), 2021-11-11
Supplement: s1 [file s1 › Parent et al._water-1395144_2021-11-01_Supplementary 3,Table S3-Species_assignments.xlsx]

## Sheet: Table S2, Species assignments
Latin name	Author	Tolerance/sensitivity, Barras et al. (2014)	Tolerance/sensitivity, Dimiza et al. (2016)	Foram-AMBI EG Jorissen et al. (2018)	Tolerance/sensitivity based on Foram-AMBI EG
Adelosina elegans	(Williamson, 1858)	sensitive	sensitive	1	sensitive
Adelosina ferussaci	(d'Orbigny, sp. Brady, 1884)	sensitive	sensitive	1	sensitive
Adelosina longirostra	(d'Orbigny, 1826)	sensitive	sensitive	1	sensitive
Adelosina mediterranensis	(Le Calvez & Le Calvez, 1958)	sensitive	sensitive	1	sensitive
Adelosina spp.	d'Orbigny, 1826	sensitive	sensitive	1	sensitive
Ammoglobigerina globigeriniformis	(Parker & Jones, 1865)			2
Ammonia beccarii	(Linnaeus, 1758)		tolerant	2
Ammonia inflata	(Seguenza, 1862) †		tolerant	2
Ammonia parkinsoniana	(d'Orbigny, 1839)		tolerant	1	sensitive
Ammonia tepida	(Cushman, 1926)		tolerant	4	tolerant
Ammonia perlucida	(Heron-Allen & Earland, 1913)		tolerant	3	tolerant
Ammonia spp.	Brünnich, 1771		tolerant
Amphycorina scalaris	(Batsch, 1791)		tolerant	2
Articulina spp.	d'Orbigny, 1826	sensitive	sensitive
Asterigerinata adriatica	Haake, 1977	sensitive	sensitive	3	tolerant
Asterigerinata mamilla	(Williamson, 1858)	sensitive	sensitive	1	sensitive
Astrononion stelligerum	(d'Orbigny, 1839)		tolerant	1	sensitive
Bigenerina nodosaria	d'Orbigny, 1826		tolerant	2
Biloculinella cylindrica	Todd, 1958	sensitive	sensitive
Biloculinella inflata	(Wright, 1902)	sensitive	sensitive
Biloculinella irregularis	(d'Orbigny, 1839)	sensitive	sensitive
Biloculinella labiata	(Schlumberger, 1891)	sensitive	sensitive	2
Bolivina dilatata	Reuss, 1850	tolerant	tolerant	2
Bolivina pseudoplicata	Heron-Allen & Earland, 1930	tolerant	tolerant	2
Bolivina pygmea	(Brady, 1881)	tolerant	tolerant
Bolivina spathulata	(Williamson, 1858)	tolerant	tolerant	3	tolerant
Bolivina spp.	d'Orbigny, 1839	tolerant	tolerant
Bolivina striatula	Cushman, 1922	tolerant	tolerant	3	tolerant
Bolivina subaenariensis	Cushman, 1922	tolerant	tolerant	2
Bolivina variabilis	(Williamson, 1858)	tolerant	tolerant	2
Buccella granulata	(di Napoli Alliata, 1952)	sensitive	sensitive	1	sensitive
Buccella spp.	Andersen, 1952	sensitive	sensitive
Bulimina aculeata	d'Orbigny, 1826	tolerant	tolerant	3	tolerant
Bulimina elongata	d'Orbigny, 1846	tolerant	tolerant	3	tolerant
Bulimina gibba	Fornasini, 1902	tolerant	tolerant	3	tolerant
Bulimina costata	d'Orbigny, 1852 †	tolerant	tolerant	2
Bulimina marginata	d'Orbigny, 1826	tolerant	tolerant	3	tolerant
Bulimina spp.	d'Orbigny, 1826	tolerant	tolerant
Cancris auriculus	(Fichtel & Moll, 1798)	tolerant	tolerant
Cassidulina carinata	Silvestri, 1896	tolerant	tolerant	4	tolerant
Cassidulina oblonga	Reuss, 1850	tolerant	tolerant	2
Cassidulinoides bradyi	(Norman, 1881)	tolerant	tolerant
Cibicidella variabilis	(d'Orbigny, 1826)	sensitive	sensitive	1	sensitive
Cibicides lobatulus	(Walker & Jacob, 1798)	sensitive	sensitive	1	sensitive
Cibicides refulgens	Montfort, 1808	sensitive	sensitive	1	sensitive
Cibicides spp.	Montfort, 1808	sensitive	sensitive
Cibicidoides pseudoungerianus	(Cushman, 1922)	sensitive	sensitive
Clavulina cylindrica	d'Orbigny, 1852			3	tolerant
Cornuspira foliacea	(Philippi, 1844)	sensitive	sensitive
Cornuspira involvens	(Reuss, 1850)	sensitive	sensitive	3	tolerant
Cornuspira spp.	Schultze, 1854	sensitive	sensitive
Cornuspiroides striolata	(Brady, 1882)	sensitive	sensitive
Cycloforina spp.	Łuczkowska, 1972	sensitive	sensitive
Cycloforina tenuicollis	(Wiesner, 1923)	sensitive	sensitive
Discorbinella bertheloti	(d'Orbigny, 1839)		sensitive	1	sensitive
Eggerelloides scaber	(Williamson, 1858)		tolerant	3	tolerant
Elphidium aculeatum	(d'Orbigny, 1846)	sensitive	sensitive	1	sensitive
Elphidium advenum	(Cushman, 1922)	sensitive	sensitive	2
Elphidium bartletti	Cushman, 1933	sensitive	sensitive
Elphidium complanatum	(d'Orbigny, 1839)	sensitive	sensitive	1	sensitive
Elphidium crispum	(Linnaeus, 1758)	sensitive	sensitive	1	sensitive
Elphidium gerthi	Van Voorthuysen, 1957	sensitive	sensitive
Elphidium granosum	(d'Orbigny, 1846)	sensitive	sensitive	3	tolerant
Elphidium incertum	(Williamson, 1858)	sensitive	sensitive
Elphidium macellum	(Fichtel & Moll, 1798)	sensitive	sensitive	1	sensitive
Elphidium poeyanum f. decipiens	(O.G.Costa, 1856)	sensitive	sensitive	2
Elphidium spp.	Montfort, 1808	sensitive	sensitive
Elphidium williamsoni	Haynes, 1973	sensitive	sensitive
Fursenkoina acuta	(d'Orbigny, 1846)		tolerant
Fursenkoina complanata	(Egger, 1893)		tolerant
Fursenkoina spp.	Loeblich & Tappan, 1961		tolerant
Gavelinopsis praegeri	(Heron-Allen & Earland, 1913)	sensitive	sensitive	1	sensitive
Gavelinopsis spp.	Hofker, 1951	sensitive	sensitive
Glabratella erecta	(Sidebottom, 1908)	sensitive	sensitive	1	sensitive
Glabratella hexacamerata	Seiglie & Bermúdez, 1965	sensitive	sensitive	1	sensitive
Globobulimina affinis	(d'Orbigny, 1839)		tolerant	2
Globocassidulina subglobosa	(Brady, 1881)		tolerant	2
Gyroidina umbonata	(Silvestri, 1898)		tolerant	2
Hanzawaia boueana	(d'Orbigny, 1846)	sensitive	tolerant
Hanzawaia spp.	Asano, 1944	sensitive	tolerant
Hauerina spp.	d'Orbigny, 1839	sensitive	sensitive
Haynesina germanica	(Ehrenberg, 1840)		tolerant	3	tolerant
Lagenammina atlantica	(Cushman, 1944)			2
Lagenammina difflugiformis	(Brady, 1879)			2
Leptohalysis scotti	(Chaster, 1892)	tolerant	tolerant	5	tolerant
Melonis barleeanus	(Williamson, 1858)		tolerant	3	tolerant
Melonis spp.	Montfort, 1808		tolerant
Miliammina fusca	(Brady, 1870)	sensitive	sensitive
Miliolids spp.		sensitive	sensitive
Miliolinella cf. hybrida	(Terquem, 1878)	sensitive	sensitive	1	sensitive
Miliolinella dilatata	(d'Orbigny, 1839)	sensitive	sensitive	1	sensitive
Miliolinella elongata	Kruit, 1955	sensitive	sensitive	1	sensitive
Miliolinella oblonga	(Montagu, 1803)	sensitive	sensitive	1	sensitive
Miliolinella semicostata	(Wiesner, 1923)	sensitive	sensitive	1	sensitive
Miliolinella spp.	Wiesner, 1931	sensitive	sensitive	1	sensitive
Miliolinella subrotunda	(Montagu, 1803)	sensitive	sensitive	1	sensitive
Miliolinella webbiana	(d'Orbigny, 1839)	sensitive	sensitive	1	sensitive
Neoconorbina spp.	Hofker, 1951	sensitive	sensitive
Neoconorbina terquemi	(Rzehak, 1888)	sensitive	sensitive	1	sensitive
Nonion depressulum	(Walker & Jacob, 1798)	tolerant	tolerant	2
Nonion scaphum	(Fichtel & Moll, 1798) †	tolerant	tolerant	4	tolerant
Nonion spp.	Montfort, 1808	tolerant	tolerant
Nonionella spp.	Cushman, 1926	tolerant	tolerant
Nonionella stella	Cushman & Moyer, 1930	tolerant	tolerant
Nonionella turgida	(Williamson, 1858)	tolerant	tolerant	5	tolerant
Nonionoides grateloupii	(d'Orbigny, 1839)		tolerant	2
Nouria polymorphinoides	Heron-Allen & Earland, 1914			3	tolerant
Nubecularia lucifuga	Defrance, 1825	sensitive	sensitive	1	sensitive
Nummoloculina spp.	Steinmann, 1881	sensitive	sensitive
Parasorites marginalis	(Lamarck, 1816)	sensitive	sensitive
Peneroplis pertusus	(Forskål, 1775)		sensitive	1	sensitive
Planorbulina mediterranensis	d'Orbigny, 1826	sensitive	sensitive	1	sensitive
Pseudobolivina spp.	Wiesner, 1931	sensitive	sensitive
Pseudoeponides falsobeccarii	Rouvillois, 1974	tolerant	tolerant	3	tolerant
Pseudotriloculina cyclostoma	(Reuss, 1850)	sensitive	sensitive
Pyrgo anomala	(Schlumberger, 1891)	sensitive	sensitive
Pyrgo depressa	(d'Orbigny, 1826)	sensitive	sensitive
Pyrgo elongata	(d'Orbigny, 1826)	sensitive	sensitive
Pyrgo sphaera	(d'Orbigny, 1839)	sensitive	sensitive
Quinqueloculina aspera	d'Orbigny, 1826	sensitive	sensitive	1	sensitive
Quinqueloculina bosciana	d'Orbigny, 1839	sensitive	sensitive	2
Quinqueloculina cf. laevigata	d'Orbigny, 1839	sensitive	sensitive
Quinqueloculina costata	d'Orbigny in Terquem, 1878	sensitive	sensitive	1	sensitive
Quinqueloculina eburnea	(d'Orbigny, 1839)	sensitive	sensitive
Quinqueloculina laevigata	d'Orbigny, 1839	sensitive	sensitive	1	sensitive
Quinqueloculina lamarckiana	d'Orbigny, 1839	sensitive	sensitive
Quinqueloculina limbata	d'Orbigny in Fornasini, 1905	sensitive	sensitive
Quinqueloculina oblonga	(Montagu, 1803)	sensitive	sensitive
Quinqueloculina parvula	Schlumberger, 1894	sensitive	sensitive	2
Quinqueloculina pygmaea	Reuss, 1850	sensitive	sensitive	3	tolerant
Quinqueloculina seminula	(Linnaeus, 1758)		sensitive	3	tolerant
Quinqueloculina seminula f. longa	(Linnaeus, 1758)		sensitive	4	tolerant
Quinqueloculina spp.	d'Orbigny, 1826	sensitive	sensitive
Quinqueloculina stalkeri	Loeblich & Tappan, 1953	sensitive	sensitive
Quinqueloculina stelligera	Terquem, 1882 †	sensitive	sensitive	3	tolerant
Rectuvigerina phlegeri	Le Calvez, 1959	tolerant	tolerant	3	tolerant
Reophax fusiformis	(Williamson, 1858)			3	tolerant
Reophax nana	Rhumbler, 1913			3	tolerant
Reophax scorpiurus	Montfort, 1808			2
Reussella spinulosa	(Reuss, 1850)	sensitive	sensitive	1	sensitive
Rosalina bradyi	(Cushman, 1915)	sensitive	sensitive	1	sensitive
Rosalina globularis	d'Orbigny, 1826	sensitive	sensitive	1	sensitive
Rosalina spp.	d'Orbigny, 1826	sensitive	sensitive	1	sensitive
Rosalina vilardebouana	d'Orbigny, 1839	sensitive	sensitive	1	sensitive
Scutuloris spp.	Loeblich & Tappan, 1953	sensitive	sensitive
Sigmoilina grata	(Terquem, 1878)	sensitive	sensitive
Sigmoilina spp.	Schlumberger, 1887	sensitive	sensitive
Sigmoilinita spp.	Seiglie, 1965	sensitive	sensitive
Siphonaperta agglutinans	(d'Orbigny, 1839)		sensitive	1	sensitive
Spirillina spp.	Ehrenberg, 1843	sensitive
Spirillina tuberculata	Brady, 1878	sensitive
Spirillina vivipara	Ehrenberg, 1843	sensitive		3	tolerant
Spiroloculina corrugata	Cushman & Todd, 1944	sensitive	sensitive
Spiroloculina elevata	Wiesner, 1923	sensitive	sensitive
Spiroloculina excavata	d'Orbigny, 1846	sensitive	sensitive	1	sensitive
Spiroloculina grateloupi	d'Orbigny, 1852	sensitive	sensitive
Spiroloculina spp.	d'Orbigny, 1826	sensitive	sensitive
Spiroloculina tenuiseptata	Brady, 1884	sensitive	sensitive
Spiroplectammina earlandi	(Parker, 1952)			2
Stainforthia fusiformis	(Williamson, 1848)		tolerant	3	tolerant
Textularia agglutinans	d'Orbigny, 1839		tolerant	3	tolerant
Textularia conica	Ehrenberg, 1840 †		tolerant	1	sensitive
Trifarina angulosa	(Williamson, 1858)		tolerant	2
Triloculina oblonga	(Montagu, 1803)	sensitive	sensitive
Triloculina plicata	Terquem, 1878	sensitive	sensitive	3	tolerant
Triloculina spp.	d'Orbigny, 1826	sensitive	sensitive
Triloculina tricarinata	d'Orbigny in Deshayes, 1832	sensitive	sensitive	1	sensitive
Triloculina trigonula	(Lamarck, 1804)	sensitive	sensitive	1	sensitive
Triloculinella spp.	Riccio, 1950	sensitive	sensitive
Uvigerina mediterranea	Hofker, 1932		tolerant	2
Valvulineria bradyana	(Fornasini, 1900)	tolerant	tolerant	4	tolerant
Valvulineria spp.	Cushman, 1926	tolerant	tolerant
Vertebralina spp.	d'Orbigny, 1826	sensitive	sensitive
Vertebralina striata	d'Orbigny, 1826	sensitive	sensitive	1	sensitive
Wellmanellinella striata	(Sidebottom, 1904)	sensitive	sensitive
Wiesnerella auriculata	(Egger, 1893)	sensitive	sensitive
