# Supplementary material for: Comparison of Four Foraminiferal Biotic Indices Assessing the Environmental Quality of Coastal Mediterranean Soft Bottoms
Source: MDPI journal article supplement (doi:10.3390/w13223193), 2021-11-11
Supplement: s1 [file s1 › Parent et al._water-1395144_2021-11-01_Supplementary 4,Table S4-Models unassigned species under 20%.pdf]

## S4. Models' parameters for index biplots including only samples with less than 20% of unassigned species (N = 65)

**Table S4.** Summarised information on the simple linear regressions between the indices based on group of indicator species (Foram-AMBI, TSI-Med, and FSI).

| List of species                       | Correction for grain size                           | Compared indices      | Equation               | R <sup>2</sup> | p-value |
|---------------------------------------|-----------------------------------------------------|-----------------------|------------------------|----------------|---------|
| Original species assignment           | Foram-AMBI and FSI are not corrected for grain size | Foram-AMBI vs TSI-Med | $y = 0.032x + 1.737$   | 0.26           | < 0.001 |
|                                       |                                                     | FSI vs TSI-Med        | $y = -0.086x + 5.579$  | 0.17           | < 0.001 |
|                                       |                                                     | FSI vs Foram-AMBI     | $y = -2.792x + 10.470$ | 0.73           | < 0.001 |
| Homogenised list of indicator species | Foram-AMBI and FSI are not corrected for grain size | Foram-AMBI vs TSI-Med | $y = 0.030x + 0.791$   | 0.76           | < 0.001 |
|                                       |                                                     | FSI vs TSI-Med        | $y = -0.087x + 7.744$  | 0.74           | < 0.001 |
|                                       |                                                     | FSI vs Foram-AMBI     | $y = -2.815x + 9.861$  | 0.92           | < 0.001 |
